# Supplementary material for: Clinical Study on the Application of Low-Dose 2L Lactulose Combined with Linaclotide in Bowel Preparation Before Colonoscopy
Source: Research Square preprint supplement (doi:10.21203/rs.3.rs-7391900/v1), 2025-10-05
Supplement: Supplementary file 1 [file 3f6e89263c68f06d0f8fe4ba.docx]

**Supplement online content**

**Title：Clinical Study on the Application of Low-Dose 2L Lactulose Combined with Linaclotide in Bowel Preparation Before Colonoscopy.**

**Method 1: Drugs and interventions.**

**Method 2: Boston Bowel Preparation Scale (BBPS) scoring criteria.**

**Method 3: Bowel Bubble Score (BBS).**

**Method 4: Visual Analog Scale scoring criteria for tolerability assessment.**

**Method 5: Analyze the definition of population.**

**Method 6: Supplementary statistical methods.**

**Baseline characteristics: Research procedure.**

**Table S1: Bowel preparation quality assessment (intention-to-treat analysis).**

**Table S2：Bowel Bubble Score (per-protocol analysis).**

**Table S3:Colonoscopy findings (per-protocol population).**

**Table S4: Visual Analog Scale score for tolerability assessment (intention-to-treat population).**

**Table S5: Bowel preparation quality in constipated patients(per-protocol analysis).**

**Method 1: Drugs and interventions.**

| **Drugs** | **Interventions** |
| --- | --- |
| **2L Lactulose Group:**  lactulose oral solution, Duphalac, 15ml/ bag, 6 bags/box. | At 8:00 PM the night before the examination: Pour the contents of 2 lactulose sachets into a cup, add 1000ml of water, and consume the mixture. 4 to 6 hours before the examination, dissolve the third box of lactulose into 1000ml water, and drink it; Until pale yellow or clear dung water is drawn. |
| **2L Lactulose + L Group:**  Lactulose + linaclotide 290μg (linaclotide capsule, Lingzeshu, 290ug/ capsule, 7 capsules/box). | 1 capsule of linalotide (290ug) taken orally half an hour before meal at 12:00 noon on the previous day， and two doses were taken after 20:00 according to the above Lactulose-taking method. |
| **3L PEG Group:**  Polyethylene Glycol （PEG）：Heshuang, 137.12g.  68.56g/ bag, each bag containing 1.46 g of sodium chloride, 5.68 g of anhydrous sodium sulfate,0.74g of potassium chloride,1.68g of sodium bicarbonate, and 59g of PEG 4000; Shenzhen Wanhe Pharmaceutical Co Ltd, Shenzhen, China. | A bag of PEG was dissolved into 1L at 20:00 1d before the examination, and was drunk at a constant rate within 2h; 4 to 6 hours before the inspection, dissolve the second bag of PEG into 2L water and drink it. |

**Method 2: Boston Bowel Preparation Scale (BBPS) scoring criteria.**

The Boston Bowel Preparation Scale (BBPS) is a standardized tool for evaluating bowel cleansing quality prior to colonoscopy. The colon is divided into three segments (right colon, transverse colon, and left colon), each scored independently, with total scores ranging from 0 to 9 points. Scoring criteria for each colonic segment:

- 0 points: Mucosa is not visible due to complete coverage by solid stool or opaque fluid, making assessment impossible.
- 1 point: Mucosa is partially visible, but significant stool residue or turbid fluid impairs visualization.
- 2 points: Minimal stool residue or fluid remains, but mucosa is adequately visible without compromising examination.
- 3 points: Mucosa is completely clean with no residual stool or fluid, providing excellent visualization.

**Method 3: Bowel Bubble Score (BBS).**

This scoring system evaluates the amount of bubbles/froth in the intestinal lumen during endoscopy. Commonly used to assess: Efficacy of pre-procedure simethicone administration and mucosal visualization quality. The higher the score, the more debris present, reflecting worse bowel preparation quality.

- Ⅰ: No bubbles.
- Ⅱ: Mild bubble interference (<25% mucosal obscuration).
- Ⅲ: Moderate (25-50%).
- Ⅳ: Severe (>50%).

**Method 4: Visual Analog Scale scoring criteria for tolerability assessment.**

To assess patient discomfort during bowel preparation (e.g., before colonoscopy), the Visual Analogue Scale (VAS) can be adapted to quantify subjective sensations. The scoring criteria are adjusted as follows:


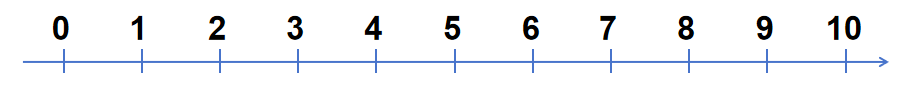


0 Points: “No discomfort”. Patients feel no abdominal distension, pain, or nausea. 1-3 Points: “Mild discomfort”. Slight abdominal tightness or bloating, no interference with daily activities. 4-6 Points: “Moderate discomfort”. Noticeable abdominal distension/pain or mild nausea, requiring some activity adjustment. 7-10 Points: "Severe discomfort”. Intense abdominal pain, persistent nausea/vomiting, or inability to tolerate oral intake.

**Method 5: Analyze the definition of population.**

- **Intention-to-treat(ITT) population**

The intention-to-treat (ITT) population comprised all patients randomized into the trial, excluding 78 individuals who were lost to follow-up or withdrew informed consent post-randomization without undergoing colonoscopy. The primary outcome analysis will be conducted as a complete-case analysis within the ITT population.

- **Per-protocol (PP) population**

The PP analysis set included patients who completed all study procedures, excluding those with inadequate bowel preparation, incomplete colonoscopy, or non-compliance with the study drug regimen.

**Method 6: Supplementary statistical methods.**

For normally distributed or approximately normally distributed continuous variables, results are presented as mean ± standard deviation. Between-group comparisons were performed using one-way analysis of variance (ANOVA) followed by least significant difference (LSD) post-hoc tests. For non-normally distributed continuous variables, data are described as median (interquartile range) and analyzed via the Kruskal-Wallis rank-sum test. Categorical variables are expressed as frequencies (percentages) [n (%)], with comparisons of rates or proportions conducted using Pearson's χ² test or Fisher's exact test as appropriate. All statistical tests were two-tailed, and a P-value <0.05 was considered indicative of statistical significance.

**Baseline characteristics: research procedure.**

A total of 444 patients were randomized in a 1:1:1 ratio to three intervention groups (n=148 per group). Seventy-eight patients (27 in the 2L Lactulose + L group, 27 in the 2L Lactulose group, and 24 in the 3L PEG group) were excluded due to cancellation of colonoscopy for reasons such as work commitments or holidays. Consequently, 366 patients were included in the ITT analysis (121 in the 2L Lactulose + L group, 121 in the 2L Lactulose group, and 124 in the 3L PEG group).

Eighteen patients (4 in the 2L Lactulose + L group, 7 in the 2L Lactulose group, and 7 in the 3L PEG group) did not complete colonoscopy due to inadequate bowel preparation that severely compromised visualization. Eleven patients (4 in the 2L Lactulose + L group, 4 in the 2L Lactulose group, and 3 in the 3L PEG group) failed to adhere to the study medication protocol. Ultimately, 337 patients (113 in the 2L Lactulose + L group, 110 in the 2L Lactulose group, and 114 in the 3L PEG group) were included in the Per-Protocol (PP) analysis (Figure S1).


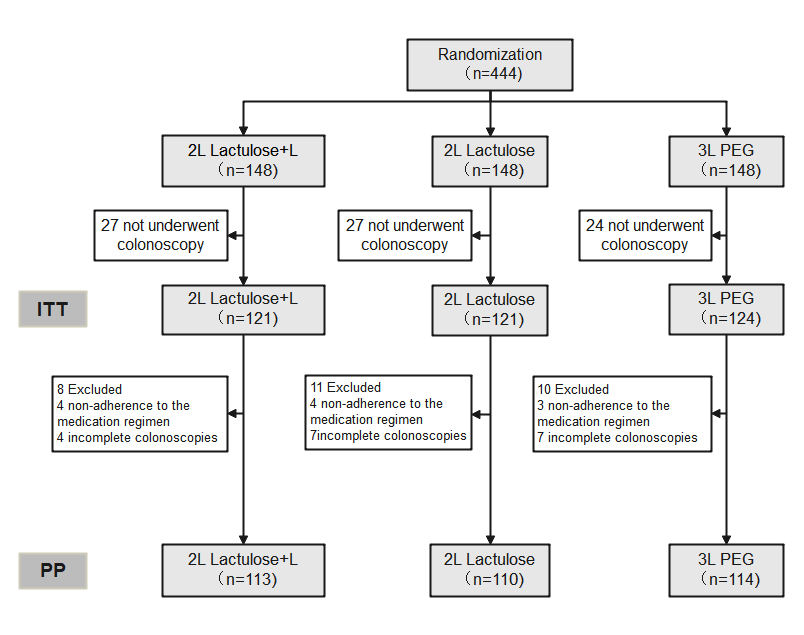


Figure S1：Flowchart of the study.

|  | **2L Lactulose+L** | **2L Lactulose** | **3L PEG** | **p** | **p-value*** | **p-value&** | **p-value#** |
| --- | --- | --- | --- | --- | --- | --- | --- |
| Intention-to-treat analysis | n=121 | n=121 | n=124 |  |  |  |  |
| Adequate bowel preparation, n (95%CI),% | 90.1 (83.5,94.2) | 83.5 (75.8,89.0) | 74.2 (65.8,81.1) | 0.004 | 0.001 | 0.129 | 0.076 |
| BBPS score,median (IQR) |  |  |  |  |  |  |  |
| Total | 7 (6,8) | 7 (6,8) | 6 (6,7) | ＜0.001 | ＜0.001 | 0.344 | ＜0.001 |
| Right colon | 2 (2,3) | 2 (2,3) | 2 (2,2) | ＜0.001 | ＜0.001 | 0.087 | 0.025 |
| Mid colon | 2 (2,3) | 2 (2,3) | 2 (2,3) | 0.009 | 0.001 | 0.112 | 0.185 |
| Left colon | 3 (2,3) | 3 (2,3) | 2 (2,3) | 0.001 | 0.002 | 0.852 | 0.001 |
| Per-protocol analysis | n=113 | n=110 | n=114 |  |  |  |  |
| Adequate bowel preparation, n (%) | 93.8 (87.8,97.0) | 90.9 (84.1,95.0) | 78.9 (70.6,85.4) | 0.001 | 0.001 | 0.415 | 0.013 |
| BBPS score,median (IQR) |  |  |  |  |  |  |  |
| Total | 7(6,8) | 7(7,8) | 7(6,7) | ＜0.001 | ＜0.001 | 0.734 | ＜0.001 |
| Right colon | 2(2,3) | 2(2,3) | 2(2,2) | ＜0.001 | ＜0.001 | 0.222 | 0.006 |
| Mid colon | 2(2,3) | 2(2,3) | 2(2,3) | 0.011 | 0.002 | 0.312 | 0.064 |
| Left colon | 3(2,3) | 3(2,3) | 2(2,3) | ＜0.001 | 0.002 | 0.445 | ＜0.001 |

Table S1: Bowel preparation quality assessment (intention-to-treat analysis).

2L Lactulose + L=2L Lactulose + 290ug Linaclotide.

3L PEG=3L Polyethylene glycol .

BBPS, Boston Bowel Preparation Scale.

p-value*，2L Lactulose + L vs 3L PEG;

*p*-value&，2L Lactulose + L vs 2L Lactulose;

*p*-value#，2L Lactulose vs 3L PEG.

Data are presented as [Median (IQR)] or n (%).

|  | **2L Lactulose+L**  **(n=113)** | **2L Lactulose**  **(n=110)** | **3L PEG**  **(n=114)** | **p-value** | **p-value*** | **p-value&** | **p-value#** |
| --- | --- | --- | --- | --- | --- | --- | --- |
| Bowel Bubble Score,n(%) |  |  |  |  |  |  |  |
| Right colon |  |  |  | 0.593 | 0.860 | 0.224 | 0.496 |
| Ⅰ | 89(78.8) | 96(87.3) | 94(82.5) |  |  |  |  |
| Ⅱ | 17(15.0) | 12(10.9) | 14(12.3) |  |  |  |  |
| Ⅲ | 5(4.4) | 2(1.8) | 5(4.4) |  |  |  |  |
| Ⅳ | 2(1.8) | 0(0.0) | 1(0.9) |  |  |  |  |
| Mid colon |  |  |  | 0.802 | 0.980 | 0.401 | 0.563 |
| Ⅰ | 90(79.6) | 96(87.3) | 93(81.6) |  |  |  |  |
| Ⅱ | 17(15.0) | 11(10.0) | 16(14.0) |  |  |  |  |
| Ⅲ | 5(4.4) | 3(2.7) | 4(3.5) |  |  |  |  |
| Ⅳ | 1(0.9) | 0(0.0) | 1(0.9) |  |  |  |  |
| Left colon |  |  |  | 0.770 | 0.926 | 0.443 | 0.493 |
| Ⅰ | 92(81.4) | 97(88.2) | 95(83.3) |  |  |  |  |
| Ⅱ | 16(14.2) | 11(10.0) | 13(11.4) |  |  |  |  |
| Ⅲ | 4(3.5) | 2(1.8) | 5(4.4) |  |  |  |  |
| Ⅳ | 1(0.9) | 0(0.0) | 1(0.9) |  |  |  |  |

Table S2：Bowel Bubble Score (per-protocol analysis).

2L Lactulose + L=2L Lactulose + 290ug Linaclotide.

3L PEG=3L Polyethylene glycol .

p-value*，2L Lactulose + L vs 3L PEG;

*p*-value&，2L Lactulose + L vs 2L Lactulose;

*p*-value#，2L Lactulose vs 3L PEG.

Data are presented as n (%).

Table S3:Colonoscopy findings (per-protocol population).

|  | 2L Lactulose+L  (n=113) | 2L Lactulose  (n=110) | 3L PEG  (n=114) | *p*-value |
| --- | --- | --- | --- | --- |
| Polyp detection rate, n (%) | 52(46.0) | 44(40.0) | 53(46.5) | 0.554 |
| Adenoma detection rate, n (%) | 15(13.3) | 19(17.3) | 19(16.7) | 0.675 |
| Cancer detection rate, n (%) | 1(0.9) | 0(0.0) | 0(0.0) | 0.370 |
| Cecal intubation rate, n (%) | 113(100.0) | 110(100.0) | 114(100.0) | NA |

2L Lactulose + L=2L Lactulose + 290ug Linaclotide.

3L PEG=3L Polyethylene glycol .

NA not applicable.

Data are presented as n (%).

Table S4: Visual Analog Scale score for tolerability assessment (intention-to-treat population).

|  | **2L Lactulose+L**  **(n=121)** | **2L Lactulose**  **(n=121)** | **3L PEG**  **(n=124)** | **p-value** | **p-value*** | **p-value&** | **p-value#** |
| --- | --- | --- | --- | --- | --- | --- | --- |
| Visual Analog Scale score,n(%) |  |  |  | 0.015 | 0.027 | 0.620 | 0.023 |
| Satisfied |  |  |  |  |  |  |  |
| 0 | 95(78.5) | 90(74.4) | 83(66.9) |  |  |  |  |
| 1-3 | 21(17.4) | 26(21.5) | 22(17.7) |  |  |  |  |
| Total | 116(95.8) | 116(95.8) | 105(84.7) |  |  |  |  |
| Dissatisfied |  |  |  |  |  |  |  |
| 4-6 | 5(4.1) | 4(3.3) | 18(14.5) |  |  |  |  |
| 7-10 | 0(0.0) | 1(0.8) | 1(0.8) |  |  |  |  |
| Total | 5(4.1) | 5(4.1) | 19(15.3) |  |  |  |  |

2L Lactulose + L=2L Lactulose + 290ug Linaclotide.

3L PEG=3L Polyethylene glycol .

p-value*，2L Lactulose + L vs 3L PEG;

*p*-value&，2L Lactulose + L vs 2L Lactulose;

*p*-value#，2L Lactulose vs 3L PEG.

Data are presented as n (%).

|  | 2L Lactulose+L  (n=14) | 2L Lactulose  (n=10) | 3L PEG  (n=11) | *p*-value | *p*-value* | *p*-value& | *p*-value# |
| --- | --- | --- | --- | --- | --- | --- | --- |
| Success of preparation, n (%) | 12(85.7) | 7(70.0) | 8(72.7) | 0.608 | 0.623 | 0.615 | 1.000 |
| BBPS score,median (IQR) |  |  |  |  |  |  |  |
| Total | 7(6,8) | 7(4,8) | 6(5,8) | 0.699 | 0.486 | 0.472 | 0.886 |
| Right colon | 2(2,3) | 2(1,2) | 2(1,2) | 0.043 | 0.110 | 0.014 | 0.487 |
| Mid colon | 2(2,3) | 2(1,3) | 2(2,3) | 0.673 | 0.776 | 0.495 | 0.423 |
| Left colon | 3(2,3) | 3(2,3) | 2(2,3) | 0.813 | 0.696 | 0.746 | 0.538 |

Table S5 ：Bowel preparation quality in constipated patients(per-protocol analysis).

2L Lactulose + L=2L Lactulose + 290ug Linaclotide.

3L PEG=3L Polyethylene glycol .

p-value*，2L Lactulose + L vs 3L PEG;

*p*-value&，2L Lactulose + L vs 2L Lactulose;

*p*-value#，2L Lactulose vs 3L PEG.

Data are presented as [Median (IQR)] or n (%).
